# Supplementary material for: Polymorphism of the Myostatin (MSTN) Gene in Landes and Kielecka Geese Breeds
Source: PubMed Central journal article supplement (PMC7022763; doi:10.3390/ani10010010), 2019-12-19
Supplement: animals-10-00010-s001.pdf [file animals-10-00010-s001.pdf]

Table S1: Nutrient contents of feed mixtures

| Item (% kg of all-mash) | Age of geese in weeks |        |        |
|-------------------------|-----------------------|--------|--------|
|                         | 1-10                  | 11-12  | 13-95  |
| Crude protein           | 18.5                  | 14.5   | 14.75  |
| Crude fat and oils*     | 2.3                   | 2.3    | 2.34   |
| Crude fibre             | 4.5                   | 4.5    | 4.8    |
| Crude ash               | 4.9                   | 4.9    | 9.62   |
| Methionine              | 0.41                  | 0.32   | 0.25   |
| Lysine                  | 0.8                   | 0.63   | 0.6    |
| Calcium                 | 1.5                   | 0.64   | 2.49   |
| Total Phosphorus        | 1                     | 0.32   | 0.33   |
| Natrium                 | 0.16                  | 0.15   | 0.16   |
| Vit. A (IU/kg)          | 10 000                | 10 000 | 10 000 |
| Vit. D3 (IU/kg)         | 3 000                 | 2 500  | 3 000  |
| Vit. E (mg/kg)          | 35.2                  | 21     | 50     |

\* only in group in age of 13-95 week of life
